# Supplementary material
Source: PubMed Central journal article supplement (PMC9285664)
Supplement: NIHMS1771819-supplement-1.pdf [file NIHMS1771819-supplement-1.pdf]

## SUPPLEMENTAL MATERIALS

**Supplementary Table 1.** Comparison of fit between a one-factor versus four-factor measurement model of physiological stress response: NSAHS, Black subsample (n = 627).

|                   | $\chi^2$ | df | CFI  | TLI  | 1-RMSEA | BIC      |
|-------------------|----------|----|------|------|---------|----------|
| One-factor model  | 3285.196 | 78 | .643 | .529 | .824    | 2782.802 |
| Four-factor model | 98.388   | 64 | .989 | .987 | .971    | -313.833 |

*Notes:* NSAHS = Nashville Stress and Health Study (2011-2014). Interpretations of fit statistics are provided below. The one-factor model allows the errors for systolic and diastolic blood pressure readings to correlate. Both models exclude control variables and latent variables for concentrated privilege, perceived discrimination, and goal-striving stress.

**Supplementary Table 2.** Distributional properties of transformed variables.

|                        | Skewness | Kurtosis | Kolmogorov-Smirnov <sup>a</sup> |     |
|------------------------|----------|----------|---------------------------------|-----|
| <b>Non-transformed</b> |          |          |                                 |     |
| Epinephrine            | 3.89     | 28.36    | .188                            | *** |
| Norepinephrine         | 2.48     | 14.65    | .153                            | *** |
| Cortisol               | 4.57     | 42.90    | .201                            | *** |
| <b>Log-transformed</b> |          |          |                                 |     |
| Epinephrine            | -.35     | 3.19     | .041                            |     |
| Norepinephrine         | -.17     | 3.05     | .032                            |     |
| Cortisol               | .01      | 2.62     | .040                            |     |

*Notes:* Statistics are weighted and calculated with non-imputed data.

<sup>a</sup> Tests the null hypothesis of a normally distributed variable.

\*\*\*  $p < .001$  (two-tailed).

**Supplementary Table 3.** Listwise deleted coefficients for the path model: NSAHS, Black subsample (n = 344).

|                                   | Endogenous Latent Variables |        |                      |       |                                |     |             |        |                         |       |                          |       |        |        |        |        |     |
|-----------------------------------|-----------------------------|--------|----------------------|-------|--------------------------------|-----|-------------|--------|-------------------------|-------|--------------------------|-------|--------|--------|--------|--------|-----|
|                                   | Perceived discrimination    |        | Goal-striving stress |       | Neuroendocrine stress response |     | Bodily pain |        | Systolic blood pressure |       | Diastolic blood pressure |       |        |        |        |        |     |
| <b>Exogenous Latent Variables</b> |                             |        |                      |       |                                |     |             |        |                         |       |                          |       |        |        |        |        |     |
| Concentrated privilege            | .726                        | (.212) | **                   | .093  | (.189)                         |     | -.360       | (.165) | *                       | .041  | (.058)                   | -.020 | (.021) | .009   | (.019) |        |     |
| Perceived discrimination          | –                           |        |                      | .453  | (.075)                         | *** | .067        | (.127) |                         | .091  | (.038)                   | *     | -.019  | (.020) | .002   | (.013) |     |
| Goal-striving stress              | –                           |        |                      | –     |                                |     | .139        | (.054) | **                      | .022  | (.020)                   |       | .012   | (.008) | .016   | (.005) | **  |
| Intercept                         | 2.412                       | (.379) | ***                  | 1.368 | (.690)                         | *   | -4.772      | (.443) | ***                     | -.270 | (.251)                   | 1.234 | (.058) | ***    | .739   | (.036) | *** |
| R-squared                         | .094                        |        |                      | .132  |                                |     | .283        |        |                         | .182  |                          | .145  |        |        | .125   |        |     |

*Notes:* Unstandardized regression coefficients are presented with robust standard errors in parentheses. Estimates adjust for control variables (not shown), post-stratification weights, and robust standard errors clustered by block group. NSAHS = Nashville Stress and Health Study (2011-2014).

\*  $p < .05$ , \*\*  $p < .01$ , \*\*\*  $p < .001$  (two-tailed).

## **Confirmatory Factor Analyses of the Measurement Model**

Supplementary Table 4 provides coefficients for confirmatory factor analyses of the measurement model. Standardized and unstandardized factor loadings are presented, along with standard errors for the unstandardized loadings. The first indicator for each latent variable is the scaling variable, and has an imposed factor loading of one and intercept of zero. Although the choice of scaling variables is somewhat arbitrary, the indicator that comes closest to reflecting the latent variable is typically chosen (Bollen 1989:152). I assigned scaling variables based on which indicators had the highest R-squared values.

The unstandardized factor loadings can be interpreted like linear regression coefficients. For every one-unit increase in the latent variable, the indicator variables can be expected to increase in units corresponding with their unstandardized loadings. Because the first indicator for each latent variable serves as the scaling factor and only loads onto one latent variable, the unstandardized factor loadings can also be interpreted relative to this scaling indicator. The standardized factor loadings can be read as correlation coefficients between the latent variables and their indicators. For every standard-deviation increase in the latent variable, the indicator variables are expected to increase in standard deviation units corresponding with their standardized loadings. Thus, squaring the standardized loading is equivalent to an indicator's R-squared value, or the proportion of variance in an indicator explained by its corresponding latent variable.

Consider the unstandardized loadings for concentrated privilege. As the proportion of White residents in a block group increases from 0 to 1, or as the percentage increases from 0 to 100, there is an expected increase in (a) the percentage of college educated residents by 38%, (b) the median household income by \$53,904 ( $= .475 \times 113,482$ ), and (c) the percentage of residents living above the poverty line by 16%. Recall that median household incomes are divided by the maximum

income (=113,482) to facilitate model convergence. The R-squared values show that the latent variable accounts for anywhere between 67% and 89% of variance in the indicators.

Other important components of Supplementary Table 4 are the rho coefficients, seen in parentheses next to the latent variable names. Rho represents factor reliability coefficients and can be interpreted as the squared correlation between the latent variable and the unweighted sum of its indicators. Unlike Cronbach's alpha, the rho formula accounts for the unique factor loadings, error variances, and correlations among indicators (see Bollen 1980:378). The reliability coefficients are worth noting if only to demonstrate the need to account for imprecise measurement in the path model. Treating these latent variables as observed scales would assume perfect reliability, which is typically an unrealistic and misleading assumption (Bollen 1989).

### **Global Fit of the Full Structural Equation Model**

Supplementary Table 5 reports global fit indices for the full model. The first column shows a significant chi-square, which tests the null hypothesis that the observed and model-implied means and covariance matrices are identical. Because this null hypothesis is often rejected with larger sample sizes, researchers also report relative fit indices that test the specified model against a baseline model, where only the variances of the observed variables are calculated. The CLI and TLI represent such indices. A general consensus is that a good-fitting model will score at least .90 on either index. Similar criteria apply to the 1-RMSEA index (Weston and Gore 2006). The model depicted in Figure 2 scores .948 on the CFI, .935 on the TLI, and .964 on the 1-RMSEA indices.

Finally, the BIC tests the specified model against its fully saturated counterpart. A negative value means the predicted model is preferred over the saturated model, while a positive value reflects the opposite (see eq. 21 in Raftery 1995). The model depicted in Figure 2 scores -1856.478, indicating that this model is superior to its saturated counterpart.

**Supplementary Table 4.** Confirmatory factor analyses of the measurement model: NSAHS Black subsample (n = 627).

|                                                                   | Unstandardized<br>Factor<br>Loading | S.E.   | Standardized<br>Factor<br>Loading | R-<br>Squared |
|-------------------------------------------------------------------|-------------------------------------|--------|-----------------------------------|---------------|
| <b>Concentrated Privilege (<math>\rho = .94</math>)</b>           |                                     |        |                                   |               |
| Proportion of White residents in block group ( $w_1$ )            | 1.000                               |        | .941                              | .885          |
| Proportion of college educated residents in block group ( $w_2$ ) | .379                                | (.074) | .818                              | .669          |
| Median household income of block group ( $w_3$ )                  | .475                                | (.036) | .918                              | .843          |
| Proportion of residents living above the poverty line ( $w_4$ )   | .160                                | (.018) | .843                              | .711          |
| <b>Perceived Discrimination (<math>\rho = .79</math>)</b>         |                                     |        |                                   |               |
| "You are treated with less respect than you deserve" ( $x_1$ )    | 1.000                               |        | .787                              | .619          |
| "You are treated with less courtesy than other people" ( $x_2$ )  | .814                                | (.043) | .673                              | .453          |
| "People act as if they think you are not smart" ( $x_3$ )         | .972                                | (.143) | .740                              | .548          |
| "People act as if they think you are dishonest" ( $x_4$ )         | .559                                | (.098) | .518                              | .268          |
| "People act as if they are better than you are" ( $x_5$ )         | .843                                | (.138) | .628                              | .394          |
| <b>Goal-Striving Stress (<math>\rho = .62</math>)</b>             |                                     |        |                                   |               |
| Subjective distance from aspirations ( $y_1$ )                    | 1.000                               |        | .827                              | .684          |
| Subjective low likelihood of reaching aspirations ( $y_2$ )       | .317                                | (.046) | .475                              | .226          |
| Emotional attachment to aspirations ( $y_3$ )                     | .498                                | (.072) | .474                              | .225          |
| <b>Neuroendocrine Stress Response (<math>\rho = .72</math>)</b>   |                                     |        |                                   |               |
| Logged epinephrine ( $z_1$ )                                      | 1.000                               |        | .953                              | .908          |
| Logged norepinephrine ( $z_2$ )                                   | .504                                | (.060) | .669                              | .448          |
| Logged cortisol ( $z_3$ )                                         | .402                                | (.087) | .423                              | .179          |
| <b>Bodily Pain (<math>\rho = .91</math>)</b>                      |                                     |        |                                   |               |
| "How bad has bodily pain been in past 4 weeks?" ( $z_4$ )         | 1.000                               |        | .911                              | .830          |
| "How often have you had pain in past 4 weeks?" ( $z_5$ )          | 1.080                               | (.045) | .911                              | .830          |
| "How many days did pain interfere in past 4 weeks?" ( $z_6$ )     | .762                                | (.062) | .847                              | .717          |
| "How much bodily pain do you feel right now?" ( $z_7$ )           | .515                                | (.041) | .666                              | .444          |
| <b>Systolic Blood Pressure (<math>\rho = .97</math>)</b>          |                                     |        |                                   |               |
| Reading #2 ( $z_8$ )                                              | 1.000                               |        | .979                              | .958          |
| Reading #1 ( $z_9$ )                                              | .960                                | (.025) | .941                              | .885          |
| Reading #3 ( $z_{10}$ )                                           | 1.022                               | (.023) | .970                              | .941          |
| <b>Diastolic Blood Pressure (<math>\rho = .95</math>)</b>         |                                     |        |                                   |               |
| Reading #2 ( $z_{11}$ )                                           | 1.000                               |        | .970                              | .941          |
| Reading #1 ( $z_{12}$ )                                           | 1.014                               | (.026) | .927                              | .859          |
| Reading #3 ( $z_{13}$ )                                           | .967                                | (.027) | .953                              | .908          |

Note: All estimates adjust for probability weighting and clustering at the block group level. NSAHS = Nashville Stress and Health Study (2011-2014). S.E. = robust standard errors for the unstandardized factor loadings. Estimates are derived with full information maximum likelihood procedures. Rho ( $\rho$ ) = reliability coefficients (Bollen 1980).

**Supplementary Table 5.** Global fit indices for the full structural equation model (n = 627).

| $\chi^2$ | df  | CFI  | TLI  | 1-RMSEA | BIC       |
|----------|-----|------|------|---------|-----------|
| 732.783  | 402 | .948 | .935 | .964    | -1856.478 |

*Note:* Based on the model depicted in Figure 2. Chi-square is significant at  $p < .001$ .

**Supplementary Table 6.** Coefficients for the path model: NSAHS White subsample (n = 625).

|                                   | Endogenous Latent Variables |        |     |                      |        |                                |        |             |        |                         |        |                          |        |       |        |        |     |
|-----------------------------------|-----------------------------|--------|-----|----------------------|--------|--------------------------------|--------|-------------|--------|-------------------------|--------|--------------------------|--------|-------|--------|--------|-----|
|                                   | Perceived discrimination    |        |     | Goal-striving stress |        | Neuroendocrine stress response |        | Bodily pain |        | Systolic blood pressure |        | Diastolic blood pressure |        |       |        |        |     |
| <b>Exogenous Latent Variables</b> |                             |        |     |                      |        |                                |        |             |        |                         |        |                          |        |       |        |        |     |
| Concentrated privilege            | -.634                       | (.219) | **  | .958                 | (.622) | .053                           | (.441) | -.027       | (.104) | -.073                   | (.070) | .044                     | (.046) |       |        |        |     |
| Perceived discrimination          |                             |        |     | .523                 | (.172) | **                             | .115   | (.127)      | .067   | (.030)                  | *      | .016                     | (.015) | .019  | (.011) |        |     |
| Goal-striving stress              |                             |        |     |                      |        |                                | .035   | (.037)      | .053   | (.011)                  | ***    | -.004                    | (.005) | -.001 | (.004) |        |     |
| Intercept                         | 3.457                       | (.168) | *** | 1.976                | (.667) | ***                            | -6.330 | (.508)      | ***    | -.030                   | (.151) | 1.175                    | (.064) | ***   | .748   | (.043) | *** |
| R-squared                         | .198                        |        |     | .264                 |        |                                | .057   |             |        | .185                    |        | .183                     |        |       | .128   |        |     |

*Notes:* Unstandardized regression coefficients are presented with robust standard errors in parentheses. Estimates adjust for control variables (not shown). Estimates are derived using full information maximum likelihood procedures, with post-stratification weights and robust standard errors clustered by block group. NSAHS = Nashville Stress and Health Study (2011-2014).

\*  $p < .05$ , \*\*  $p < .01$ , \*\*\*  $p < .001$  (two-tailed).

**Supplementary Table 7.** Decomposition of associations between concentrated privilege (CP) and stress response latent variables: NSAHS White subsample (n = 625).

|                    | Neuroendocrine stress response |        | Bodily pain |          | Systolic blood pressure |        | Diastolic blood pressure |        |
|--------------------|--------------------------------|--------|-------------|----------|-------------------------|--------|--------------------------|--------|
| Direct             | .053                           | (.441) | -.027       | (.104)   | -.073                   | (.070) | .044                     | (.046) |
| Specific Indirect: |                                |        |             |          |                         |        |                          |        |
| CP → PD →          | -.073                          | (.085) | -.043       | (.025)   | -.010                   | (.010) | -.012                    | (.008) |
| CP → GSS →         | .033                           | (.035) | .050        | (.035)   | -.004                   | (.005) | -.001                    | (.003) |
| CP → PD → GSS →    | -.012                          | (.014) | -.017       | (.009) * | .001                    | (.002) | .000                     | (.001) |
| Total Indirect     | -.051                          | (.095) | -.010       | (.043)   | -.013                   | (.011) | -.013                    | (.009) |
| Total              | .002                           | (.434) | -.037       | (.108)   | -.085                   | (.067) | .032                     | (.046) |

*Notes:* Unstandardized coefficients are reported with robust standard errors in parentheses. NSAHS = Nashville Stress and Health Study (2011-2014). PD = Perceived discrimination. GSS = Goal-striving stress.

\*  $p < .05$ , \*\*  $p < .01$  (two-tailed).

## REFERENCES FOR SUPPLEMENTAL MATERIALS

- Bollen, Kenneth A. 1980. "Issues in the Comparative Measurement of Political Democracy." *American Sociological Review* 45(3):370–90.
- Bollen, Kenneth A. 1989. *Structural Equations with Latent Variables*. New York, NY: John Wiley & Sons.
- Raftery, Adrian E. 1995. "Bayesian Model Selection in Social Research." *Sociological Methodology* 25:111–63.
- Weston, Rebecca, and Paul A. Gore. 2006. "A Brief Guide to Structural Equation Modeling." *The Counseling Psychologist* 34(5):719–51.
